# Supplementary material for: Determination of Urinary Mycotoxin Biomarkers Using a Sensitive Online Solid Phase Extraction-UHPLC-MS/MS Method
Source: MDPI journal article supplement (doi:10.3390/toxins13060418), 2021-06-11
Supplement: s1 [file s1]

# Determination of Urinary Mycotoxin Biomarkers Using a Sensitive Online Solid Phase Extraction-UHPLC-MS/MS Method

Jessica Schmidt, Benedikt Cramer, Paul C. Turner, Rebecca J. Stoltzfus, Jean H. Humphrey, Laura E. Smith and Hans-Ulrich Humpf

**Table S1.** sMRM parameters of the validated online SPE-UHPLC-MS/MS method.

| Analyte                                         | Q1 mass [Da] <sup>a</sup> | Q3 mass [Da] <sup>a</sup> | Expected Retention Time [min] | Window [sec] | DP [V] <sup>b</sup> | CE [V] <sup>c</sup> | CXP [V] <sup>d</sup> |
|-------------------------------------------------|---------------------------|---------------------------|-------------------------------|--------------|---------------------|---------------------|----------------------|
| AFM <sub>1</sub>                                | 329.1 [M+H] <sup>+</sup>  | 229.0                     | 5.7                           |              | 41                  | 53                  | 15                   |
|                                                 | 329.1 [M+H] <sup>+</sup>  | 273.0                     | 5.7                           |              | 41                  | 33                  | 15                   |
| ALT                                             | 293.1 [M+H] <sup>+</sup>  | 239.0                     | 6.1                           |              | 30                  | 27                  | 12                   |
|                                                 | 293.1 [M+H] <sup>+</sup>  | 139.0                     | 6.1                           |              | 30                  | 84                  | 12                   |
| AME                                             | 271.0 [M-H] <sup>-</sup>  | 213.1                     | 8.5                           |              | -44                 | -45                 | -20                  |
|                                                 | 271.0 [M-H] <sup>-</sup>  | 211.1                     | 8.5                           |              | -44                 | -50                 | -20                  |
| AOH                                             | 257.0 [M-H] <sup>-</sup>  | 147.1                     | 7.0                           |              | -80                 | -38                 | -11                  |
|                                                 | 257.0 [M-H] <sup>-</sup>  | 157.1                     | 7.0                           |              | -80                 | -36                 | -11                  |
| CIT                                             | 251.1 [M+H] <sup>+</sup>  | 215.0                     | 6.9                           | 60           | 75                  | 35                  | 13                   |
|                                                 | 251.1 [M+H] <sup>+</sup>  | 205.0                     | 6.9                           | 60           | 75                  | 36                  | 13                   |
| DH-CIT                                          | 267.1 [M+H] <sup>+</sup>  | 203.1                     | 6.6                           | 45           | 51                  | 39                  | 14                   |
|                                                 | 267.1 [M+H] <sup>+</sup>  | 231.1                     | 6.6                           | 45           | 51                  | 32                  | 14                   |
| FB <sub>1</sub>                                 | 722.4 [M+H] <sup>+</sup>  | 334.2                     | 6.4                           |              | 41                  | 55                  | 18                   |
|                                                 | 722.4 [M+H] <sup>+</sup>  | 352.2                     | 6.4                           |              | 41                  | 51                  | 20                   |
| OTA                                             | 404.1 [M+H] <sup>+</sup>  | 221.0                     | 8.5                           |              | 35                  | 48                  | 11                   |
|                                                 | 404.1 [M+H] <sup>+</sup>  | 102.0                     | 8.5                           |              | 35                  | 88                  | 11                   |
|                                                 | 404.1 [M+H] <sup>+</sup>  | 239.0                     | 8.5                           |              | 35                  | 31                  | 11                   |
| ZEN                                             | 317.2 [M-H] <sup>-</sup>  | 175.0                     | 8.6                           |              | -140                | -32                 | -11                  |
|                                                 | 317.2 [M-H] <sup>-</sup>  | 131.0                     | 8.6                           |              | -140                | -38                 | -11                  |
| $\alpha$ -/ $\beta$ -ZEL                        | 319.2 [M-H] <sup>-</sup>  | 174.1                     | 7.5                           | 60           | -160                | -34                 | -15                  |
|                                                 | 319.2 [M-H] <sup>-</sup>  | 160.1                     | 7.5                           | 60           | -160                | -39                 | -15                  |
| <sup>13</sup> C <sub>17</sub> -AFM <sub>1</sub> | 346.3 [M+H] <sup>+</sup>  | 242.2                     | 5.7                           |              | 41                  | 53                  | 15                   |
|                                                 | 346.3 [M+H] <sup>+</sup>  | 288.1                     | 5.7                           |              | 41                  | 33                  | 15                   |
| <sup>13</sup> C <sub>3</sub> -CIT               | 254.1 [M+H] <sup>+</sup>  | 218.0                     | 6.9                           | 45           | 75                  | 35                  | 13                   |
|                                                 | 254.1 [M+H] <sup>+</sup>  | 208.0                     | 6.9                           | 45           | 75                  | 36                  | 13                   |
| <sup>13</sup> C <sub>3</sub> -DH-CIT            | 270.1 [M+H] <sup>+</sup>  | 206.1                     | 6.6                           |              | 54                  | 39                  | 14                   |
|                                                 | 270.1 [M+H] <sup>+</sup>  | 234.1                     | 6.6                           |              | 54                  | 32                  | 14                   |
| <sup>13</sup> C <sub>34</sub> -FB <sub>1</sub>  | 756.1 [M+H] <sup>+</sup>  | 356.3                     | 6.4                           |              | 41                  | 55                  | 18                   |
|                                                 | 756.1 [M+H] <sup>+</sup>  | 374.3                     | 6.4                           |              | 41                  | 51                  | 20                   |
| <i>d</i> <sub>5</sub> -OTA                      | 409.1 [M+H] <sup>+</sup>  | 221.0                     | 8.5                           |              | 35                  | 48                  | 11                   |
|                                                 | 409.1 [M+H] <sup>+</sup>  | 102.0                     | 8.5                           |              | 35                  | 88                  | 11                   |
|                                                 | 409.1 [M+H] <sup>+</sup>  | 239.0                     | 8.5                           |              | 35                  | 31                  | 11                   |
| <i>d</i> <sub>2</sub> -ZEN                      | 319.2 [M-H] <sup>-</sup>  | 177.0                     | 8.6                           |              | -140                | -32                 | -11                  |
|                                                 | 319.2 [M-H] <sup>-</sup>  | 133.0                     | 8.6                           |              | -140                | -38                 | -11                  |

<sup>a</sup> Quantifier above, qualifier below; <sup>b</sup> declustering potential; <sup>c</sup> collision energy; <sup>d</sup> collision cell exit potential

**Table S2.** Accuracy and relative standard deviations determined during intra- and interday repeatability at the second highest calibration level.

| Analyte          | Intraday <sup>a</sup> |                      | Interday <sup>b</sup> |                      |
|------------------|-----------------------|----------------------|-----------------------|----------------------|
|                  | Accuracy [%]          | RSD <sup>c</sup> [%] | Accuracy [%]          | RSD <sup>c</sup> [%] |
| AFM <sub>1</sub> | 103                   | 3                    | 101                   | 4                    |
| ALT              | 99                    | 1                    | 97                    | 3                    |
| AME              | 134                   | 5                    | 117                   | 15                   |
| AOH              | 110                   | 3                    | 104                   | 5                    |
| CIT              | 103                   | 2                    | 102                   | 4                    |
| DH-CIT           | 103                   | 5                    | 103                   | 6                    |
| FB <sub>1</sub>  | 117                   | 8                    | 128                   | 10                   |
| OTA              | 106                   | 4                    | 105                   | 5                    |
| ZEN              | 117                   | 5                    | 116                   | 4                    |
| α-ZEL            | 115                   | 6                    | 115                   | 6                    |
| β-ZEL            | 103                   | 7                    | 110                   | 10                   |

<sup>a</sup> *n* = 12; <sup>b</sup> *n* = 4 on three different days; <sup>c</sup> relative standard deviation.

**Table S3.** Concentrations of the analytes and stable isotope-labelled standards in the calibration solutions.

| Analyte          | Concentration Levels in Calibration Solutions [ng/mL] |       |       |       |      |      |      |     | Int. Standard                                   | 1–8  |
|------------------|-------------------------------------------------------|-------|-------|-------|------|------|------|-----|-------------------------------------------------|------|
|                  | 1                                                     | 2     | 3     | 4     | 5    | 6    | 7    | 8   |                                                 |      |
| AFM <sub>1</sub> | 0.025                                                 | 0.063 | 0.13  | 0.19  | 0.25 | 0.63 | 1.3  | 2.5 | <sup>13</sup> C <sub>17</sub> -AFM <sub>1</sub> | 0.20 |
| ALT              | 0.70                                                  | 1.8   | 3.5   | 5.3   | 7.0  | 18   | 35   | 70  | —                                               | —    |
| AME              | 0.040                                                 | 0.10  | 0.20  | 0.30  | 0.40 | 1.0  | 2.0  | 4.0 | —                                               | —    |
| AOH              | 0.90                                                  | 2.3   | 4.5   | 6.8   | 9.0  | 23   | 45   | 90  | —                                               | —    |
| CIT              | 0.30                                                  | 0.75  | 1.5   | 2.3   | 3.0  | 7.5  | 15   | 30  | <sup>13</sup> C <sub>3</sub> -CIT               | 3.0  |
| DH-CIT           | 0.20                                                  | 0.50  | 1.0   | 1.5   | 2.0  | 5.0  | 10   | 20  | <sup>13</sup> C <sub>3</sub> -DH-CIT            | 2.0  |
| FB <sub>1</sub>  | 0.014                                                 | 0.035 | 0.070 | 0.11  | 0.14 | 0.35 | 0.70 | 1.4 | <sup>13</sup> C <sub>34</sub> -FB <sub>1</sub>  | 0.14 |
| OTA              | 0.012                                                 | 0.030 | 0.060 | 0.090 | 0.12 | 0.30 | 0.60 | 1.2 | <i>d</i> <sub>5</sub> -OTA                      | 0.12 |
| ZEN              | 0.035                                                 | 0.088 | 0.18  | 0.26  | 0.35 | 0.88 | 1.8  | 3.5 | <i>d</i> <sub>2</sub> -ZEN                      | 0.35 |
| α-ZEL            | 0.15                                                  | 0.38  | 0.75  | 1.1   | 1.5  | 3.8  | 7.5  | 15  | <i>d</i> <sub>2</sub> -ZEN                      | 0.35 |
| β-ZEL            | 0.15                                                  | 0.38  | 0.75  | 1.1   | 1.5  | 3.8  | 7.5  | 15  | <i>d</i> <sub>2</sub> -ZEN                      | 0.35 |
